# Supplementary material for: The Laurentide Ice Sheet in southern New England and New York during and at the end of the Last Glacial Maximum – A cosmogenic-nuclide chronology
Source: Copernicus journal article supplement (doi:10.5194/egusphere-2024-241), 2024-02-01
Supplement: Supplementary file [file egusphere-2024-241-AC1-supplement.pdf]

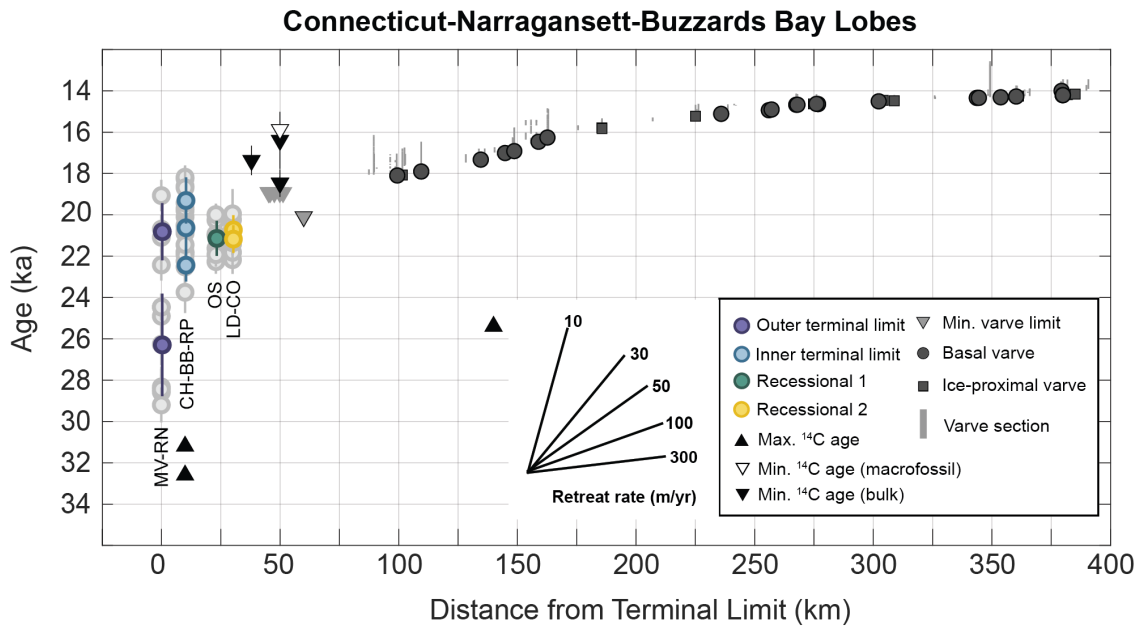

**Figure 5** - Time distance diagram for the Connecticut-Narragansett-Buzzards Bay Lobes of the LIS based on the exposure age, radiocarbon, and varve chronologies. Only <sup>10</sup>Be ages are shown for simplicity. Individual boulder ages are shown as light gray circles and average moraine ages are colored as in Figure 1. Moraine names indicated below each limit in order of oldest to youngest. MV = Martha's Vineyard Moraine, RN = Ronkonkoma Moraine, CH = Charlestown Moraine, BB = Buzzard's Bay Moraine, RP = Roanoke Point Moraine, OS = Old Saybrook Moraine, LD = Ledyard Moraine, CO = Congdon Hill moraine. Inset shows the slopes associated with various retreat rates.
